# Supplementary material for: Paleogenetic study on the 17th century Korean mummy with atherosclerotic cardiovascular disease
Source: PubMed Central journal article supplement (PMC5559090; doi:10.1371/journal.pone.0183098), 2017-08-16
Supplement: pone.0183098.s002.pdf [file pone.0183098.s002.pdf]

**(A) Consensus sequence of mtDNA control region for Mungyeong mummy**

**PS1**

```
1 120
Consensus CAAAGCTAAGATTCTAATTAAACTATTCTCTGTTCTTTTCATGGGAAGCAGATTTGGGTACCACCAAGTATTGACTCACCATCAACAACCGCTATGTATTCGTACATTACTGCCAG
MgB-PS1-01 .....
MgB-PS1-02 .....
MgB-PS1-03 .....
MgB-PS1-04 .....
MgB-PS1-05 .....
MgB-PS1-06 .....
MgB-PS1-07 .....
MgB-PS1-08 .....
MgB-PS1-09 .....
MgB-PS1-10 .....
MgB-PS1-11 .....G.....
```

```
121 227
Consensus CCACCATGAATATTGTACGGTACCATAAACTTACCACCTGTAGTACATAAAAAACCAATCCACATCAAAACCCCTCCCCATGCTTACAAGCAAGTACAGCAAT
MgB-PS1-01 .....
MgB-PS1-02 .....
MgB-PS1-03 .....
MgB-PS1-04 .....
MgB-PS1-05 .....
MgB-PS1-06 .....
MgB-PS1-07 .....
MgB-PS1-08 .....
MgB-PS1-09 .....
MgB-PS1-10 .....
MgB-PS1-11 .....
```

**PS2**

```
1 120
Consensus AAACCCAATCCACATCAAAACCCCTCCCATGCTTACAAGCAAGTACAGCAATCAACCTTCAACTATCACACATCAACTGCAACTCCAAGCCACCCCTCACCCACTAGGATACCAACA
MgB-PS2-01 .....
MgB-PS2-02 .....
MgB-PS2-03 .....C.....
MgB-PS2-04 .....
MgB-PS2-05 .....
MgB-PS2-06 .....C.....
MgB-PS2-07 .....
MgB-PS2-08 .....
MgB-PS2-09 .....
MgB-PS2-10 .....
MgB-PS2-11 .....
```

```
121 227
Consensus AACCTACCCACCTTAACAGTACATAGTACATAAAGCCATTTACCGTACATAGCACATTACAGTCAAATCCCTTCTCGCCCCCATGGATGACCCCTCAGATAGGG
MgB-PS2-01 .....
MgB-PS2-02 .....
MgB-PS2-03 .....
MgB-PS2-04 .....
MgB-PS2-05 .....
MgB-PS2-06 .....
MgB-PS2-07 .....
MgB-PS2-08 .....
MgB-PS2-09 .....
MgB-PS2-10 .....C.....
MgB-PS2-11 .....
```

**PS3**

1 120  
Consensus GGAGCTCTCCATGCATTTGGTATTTTCGTCTGGGGGGTGTGCACGCGATAGCATTGCGAGACGCTGGAGCCGGAGCACCCCTATGTCGCAGTATCTGTCTTTGATTCTGCCTCATCCTAT  
MgB-PS3-01 .....  
MgB-PS3-02 .....  
MgB-PS3-03 .....  
MgB-PS3-04 .....  
MgB-PS3-05 .....  
MgB-PS3-06 .....  
MgB-PS3-07 .....  
MgB-PS3-08 .....  
MgB-PS3-09 .....  
MgB-PS3-10 .....

121 185  
Consensus TATTTATCGCACCTACGTTCAATATTACAGCGAACATACTTACTAAAGTGTGTTAATTAATTAA  
MgB-PS3-01 .....  
MgB-PS3-02 .....  
MgB-PS3-03 .....  
MgB-PS3-04 .....  
MgB-PS3-05 .....  
MgB-PS3-06 .....  
MgB-PS3-07 .....  
MgB-PS3-08 .....  
MgB-PS3-09 .....  
MgB-PS3-10 .....

**PS4**

1 120  
Consensus AATATTACAGCGAACATACTTACTAAAGTGTGTTAATTAATTAATGCTTGTAGGACATAATAATAACAATTGAATGTCTGCACAGCCGCTTCCACACAGACATCATAACAAAAAATTT  
MgB-PS4-01 .....  
MgB-PS4-02 .....  
MgB-PS4-03 .....  
MgB-PS4-04 ..... C .....  
MgB-PS4-05 ..... .G .....  
MgB-PS4-06 .....  
MgB-PS4-07 .....  
MgB-PS4-08 .....

121 196  
Consensus CCACCAAccccccctccccccGCTTCTGGCCACAGCACTTAAACACATCTCTGCCAAACCCCAAAAACAAAGAAC  
MgB-PS4-01 .....  
MgB-PS4-02 .....  
MgB-PS4-03 .....  
MgB-PS4-04 .....  
MgB-PS4-05 .....  
MgB-PS4-06 .....  
MgB-PS4-07 .....  
MgB-PS4-08 .....

**PS5**

1 125  
Consensus TAACAGTCACCCCAACTAACACATTATTTCCCTCCCCTCCCATACTACTAATCTCATCAACACAACCCCGCCATCCTACCCAGCACACACACCCGCTGCTAACCCCATACCCCGAAC  
MgB-PS5-01 .....  
MgB-PS5-02 .....  
MgB-PS5-03 .....  
MgB-PS5-04 .....  
MgB-PS5-05 .....  
MgB-PS5-06 .....  
MgB-PS5-07 .....  
MgB-PS5-08 .....  
MgB-PS5-09 .....

**(B) Comparison between rCRS, consensus sequence and direct sequencing result of mtDNA control region**

**Hypervariable region 1**

```
15991 16110
rCRS CAAAGCTAAGATTCTAATTTAAACTATTCTCTGTTCTTTTCATGGGGAAGCAGATTTGGGTACCACCCAAGTATTGACTCACCCATCAACAACCGCTATGTATTTTCGTACATTACTGCCAG
Consensus .....
Direct (PS1-FWD) .....
Direct (PS1-REV) .....

16111 16230
rCRS CCACCATGAATATTGTACGGTACCATAAACTTACCACCTGTAGTACATAAAAACCCAATCCACATCAAACCCCTCCCATGCTTACAAGCAAGTACAGCAATCAACCCCTCAACTA
Consensus .....T.....
Direct (PS1-FWD) .....
Direct (PS1-REV) .....
Direct (PS2-FWD) .....T.....

16231 16350
rCRS TCACACATCAACTGCAACTCCAAAGCCACCCCTCACCCACTAGGATACCAACAAACCTACCACCCTTAACAGTACATAGTACATAAAGCCATTTACCCTACATAGCACATTACAGTCAA
Consensus .....
Direct (PS2-FWD) .....
Direct (PS2-REV) .....

16351 16390
rCRS ATCCCTTCTCGTCCCATGGATGACCCCTCAGATAGGG
Consensus .....C.....
Direct (PS2-FWD) .....C.....
Direct (PS2-REV) .....C.....
```

**Hypervariable region 2**

```
35 154
rCRS GGAGCTCTCCATGCATTTGGTATTTTCGTCTGGGGGTATGCACGCGATAGCATTGCGAGACGCTGGAGCCGGAGCACCCCTATGTGCGAGTATCTGTCTTTGATTCCTGCCTCATCCTAT
Consensus .....G.....
Direct (PS3-FWD) .....G.....
Direct (PS3-REV) .....G.....

155 274
rCRS TATTTATCGCACCTACGTTCAATATTACAGCGAACATACTTACTAAAGTGTGTTAATTAATTAATGCTTGTAGGACATAATAATAACAATTGAATGTCTGCACAGCCACTTCCACACA
Consensus .....G.....
Direct (PS3-FWD) .....
Direct (PS3-REV) .....
Direct (PS4-FWD) .....G.....

275 369
rCRS GACATCATAACAAAAAATTTCCACCAAccccccctcccc-GCTTCTGGCCACAGCACTTAAACACATCTCTGCCAAACCCCAAAAAACAAGAAC
Consensus .....C.....
Direct (PS4-FWD) .....C.....
Direct (PS4-REV) .....C.....
```

**Hypervariable region 3**

```
424 548
rCRS TAACAGTCACCCCAACTAACACATTATTTCCCTCCCACTCCCACTACTACTAATCTCATCAATACAACCCCGCCATCTACCCAGcacacacacaccgctgctaaccataaccggaac
Consensus .....C.....
Direct (PS5-FWD) .....C.....
```
